# Supplementary material for: La taquilla toma los Globos
Source: HighWire-hosted journal article supplement (doi:10.1136/bmjopen-2021-060068), 2010-01-01
Supplement: bmjopen-2021-060068supp001_data_supplement.pdf [file bmjopen-2021-060068supp001_data_supplement.pdf]

## 長庚醫療財團法人嘉義院區 長庚紀念醫院

## 受試者同意書

|                                                                                                                                                                   |                           |
|-------------------------------------------------------------------------------------------------------------------------------------------------------------------|---------------------------|
| 一、計畫名稱：抑制 PCSK9 在急性中風和症狀性顱內動脈粥狀硬化病人的治療 – 運用高解析度磁振造影血管壁影像的前瞻性隨機開放性盲法終點性研究                                                                                          |                           |
| 二、研究基本資料                                                                                                                                                          | 病歷號碼：_____                |
| 1.計畫編號：                                                                                                                                                           |                           |
| IRB 案號/申請編號：                                                                                                                                                      |                           |
| 2.試驗機構：嘉義長庚紀念醫院                                                                                                                                                   |                           |
| 執行單位：急診科和神經內科                                                                                                                                                     |                           |
| 3.委託單位/廠商：長庚腦中風研究計畫                                                                                                                                               |                           |
| 4.主持人：黃彥筑                                                                                                                                                         | 服務單位：神經科                  |
| 職稱：主治醫師                                                                                                                                                           | 電話：0975353286 (受試者緊急聯絡電話) |
| 05-3621000 - 2813                                                                                                                                                 |                           |
| 共同主持人：李建德                                                                                                                                                         | 服務單位：神經科                  |
| 職稱：主治醫師                                                                                                                                                           |                           |
| 共同主持人：李孟                                                                                                                                                          | 服務單位：神經科                  |
| 職稱：主治醫師                                                                                                                                                           |                           |
| 共同主持人：楊仁宗                                                                                                                                                         | 服務單位：腦神經外科                |
| 職稱：主治醫師                                                                                                                                                           |                           |
| 共同主持人：林稜傑                                                                                                                                                         | 服務單位：急診科                  |
| 職稱：主治醫師                                                                                                                                                           |                           |
| 共同主持人：蔡元雄                                                                                                                                                         | 服務單位：放射科                  |
| 職稱：主治醫師                                                                                                                                                           |                           |
| 6.受試者姓名：                                                                                                                                                          | 受試者研究編號：                  |
| 性別：                                                                                                                                                               | 出生日期：                     |
| 通訊地址：                                                                                                                                                             |                           |
| 聯絡電話：                                                                                                                                                             |                           |
| 三、簡介：                                                                                                                                                             |                           |
| <p>您好，我們敬邀您參加一個腦中風的研究。顱內動脈粥狀硬化狹窄是亞洲人中最常見的缺血性中風原因之一，且其中風復發發生率最高。顱內動脈粥狀硬化狹窄的治療主要在降低中風復發，治療方式包括抗血小板治療、降血脂治療、介入治療和中風危險因素調整。顱內動脈粥狀硬化狹窄的病人，當前的指南建議，採用雙重抗血小板和高強度史塔汀類</p> |                           |

人體試驗倫理委員會  
核對  
110.3.22  
長庚醫療財團法人

(Statin) 藥物治療，以減少未來發生中風和心血管事件的風險。但高強度史塔汀類 (Statin) 治療常有較高的副作用，導致無法達成高強度史塔汀類 (Statin) 治療。

抑制 PCSK9 的單克隆抗體為一類新型藥物，可有效降低低密度脂蛋白膽固醇，且副作用少。本試驗是用高解析度 MRI，評估 PCSK9 單克隆抗體 Alirocumab (保脂通) 治療，是否能夠有效穩定症狀性顱內動脈粥樣硬化斑塊。本研究將在嘉義長庚紀念醫院執行收案，預計三年共收 60 位病人參加研究。依衛生主管機關規定，您必須被告知接受試驗之目的及可能的風險。

在同意參加本研究之前，研究主持人/醫師會向您說明這份受試者同意書的內容、回答您的任何疑問，並給予您充分時間考慮，請再次徹底閱讀這份受試者同意書，並且問清楚任何問題。此外，要不要參加研究，完全是自願性質，如果不同意參加研究，並不會影響到您的正當權益。

#### 四、研究目的：

本試驗是使用高解析度 MRI 對來自顱內動脈粥狀硬化狹窄的急性缺血性中風病人進行前瞻性、隨機、開放標籤、盲法終點研究，以評估 PCSK9 單克隆抗體 Alirocumab (保脂通) 的療效和安全性。本研究試驗藥物 Alirocumab (保脂通) 目前用於治療有心血管疾病的病人，可在原本史塔汀類 (Statin) 類藥物治療下，進一步再降低膽固醇，降低未來心血管疾病復發。因此，我們假設在史塔汀類 (Statin) 類藥物治療的背景加上本研究試驗藥物 Alirocumab (保脂通) 治療可穩定顱內斑塊且減低動脈狹窄程度，降低未來心血管疾病復發。

單克隆抗體是一種大分子蛋白，與傳統小分子藥物相比，單克隆抗體藥物具有靶向性好，療效確切，毒副反應小等優勢，是目前在腫瘤、免疫疾病和心血管疾病新型治療藥物，本研究試驗藥物 Alirocumab (保脂通) 是一種單克隆抗體，作用於肝臟細胞的 PCSK9 的受體，減少 PCSK9 受體代謝，進而增加體內膽固醇的清除。史塔汀類 (Statin) 類藥物是 HMG-CoA 還原酶抑制劑，是目前主要降低膽固醇的藥物，可藉由抑制肝臟的膽固醇合成，增加肝臟細胞低密度膽固醇受體數量與活性，有效的降低血漿總膽固醇及低密度膽固醇濃度。

#### 五、納入/排除條件：

一、如果您符合下列的納入/排除條件才有資格參與本試驗

##### 1. 納入條件

因急性缺血腦中風至嘉義長庚急診求診的病人，包含：

- [1] 具有缺血性中風的臨床診斷，NIHSS 分數 1 至 15 分。
- [2] 顱內動脈粥狀硬化狹窄 (ICAS) 之中風，且於 diffuse-weighted imaging 可見到其灌注區域有缺血性病灶。
- [3] 症狀性的顱內動脈粥狀硬化狹窄 (ICAS) 超過 30%，包含中大腦穿支動脈 M1 或 M2、椎基底動脈或顱內的內頸動脈部位。

人體試驗倫理委員會  
核准日期  
110.3.22  
長庚醫療財團法人

- [4] 接受降脂治療（例如 Statin 或 ezetimibe）的受試者其血清 LDL-C $\geq$ 70mg/dL 或未接受降脂治療的受試者其 LDL-C $\geq$ 100mg/dL。
- [5] 可以在中風發作 7 天內接受隨機分組藥物治療。
- [6] 頭部 CT 或 MRI 排除可能解釋其症狀或有禁忌接受其療法的出血或其他病理情況，例如血管畸形，腫瘤或膿腫。
- [7] 中風前 modified Rankin Scale (mRS) $\leq$ 2

## 2.排除條件

- [1] 年紀小於 20 歲。
- [2] 根據臨床主治醫師的判斷需排除。
- [3] 顱內動脈粥狀硬化狹窄 (ICAS)，接受過血管內介入治療。
- [4] 磁共振造影顯示顱外血管有超過 50%的狹窄或阻塞，包含頸動脈和椎動脈
- [5] 心臟栓塞源高風險患者，例如心房顫動，急性心肌梗塞，嚴重心臟衰竭或瓣膜性心臟病。
- [6] 其他確定的中風病因，如血管炎、休克、抗磷脂抗體症候群，動脈剝離、CADASIL 等。
- [7] 對於本研究試驗藥物 Alirocumab (保脂通)或 Gadolinium (釷)使用有禁忌症或過敏
- [8] 嚴重腎臟不全 (血清肌酐 $>$  2 mg/dL 或計算腎小球濾過率 $<$ 30 mL/min/ 1.73 m<sup>2</sup>)
- [9] 肝功能異常 (ALT $>$  40 U/L)。
- [10] 當前的血小板減少症 ( $<$ 100  $\times 10^9$  /L) 或白細胞減少症 ( $<$ 2  $\times 10^9$  /L)。
- [11] 凝血功能異常 (INR $>$ 1.2; aPTT ratio $>$ 1.2)。
- [12] 貧血 ( $<$ 10 mg/dL)。

(其他細項請參考試驗計畫書)

## 六、試驗方法與程序說明：

如果您自願參與本研究，將於中風發生 7 天內接受腦部磁共振造影(MRI)的檢查，腦部磁共振造影會注射顯影劑，主要目的是運用磁共振造影找出在大腦中動脈、基底動脈或內頸動脈顱內部分有症狀的顱內動脈狹窄（超過 30%）。參加計劃的所有病人均接受抗血小板藥物和高強度史塔汀類 (Statin) 治療，包括 Atorvastatin 40-80 mg 或 Rosuvastatin 20mg，或最大 statin 耐受劑量。其中有 20 位病人隨機分為治療組(機會為三分之一)，將於每 2 週皮下接受 Alirocumab (保脂通)治療，共持續 26 週。並於 26 週後追蹤 MRI，觀察顱內動脈粥樣硬化斑塊的消退，包含狹窄程度、血管壁面積指數和顯影體積。

如果有參與本研究，包含治療組和對照組，兩週後會抽血檢查肝功能 ALT 和肌酸激酶 CPK，確認無藥物相關副作用，12 週後會抽血追蹤肝功能、肌酸激酶和脂質檢查套組(總膽固醇、三酸甘油酯、低密度脂蛋白膽固醇和高密度脂蛋白膽固醇)，26 週後會抽血追蹤。

肝功能、肌酸激酶、脂質檢查套組和糖化血色素，每次抽約 5-10 c.c。

腦部磁振造影的檢查，是利用磁場的變化獲得腦部組織的精確影像，不會有輻射累積和傷害，檢查時需要平躺、且頭部固定不動，然後進入儀器內檢查（如右圖所示），顯影劑的注射是從手部的靜脈針頭給藥，全程所需要的檢查時間約 40-60 分鐘，可以用來偵測腦部的中風的位置、以及血管阻塞情況。

另外，我們將分別於中風住院時、第 7 天、出院、第 90 天和第 180 天評估病人的中風恢復情況。

七、可預期之風險、副作用、發生率及處理方法：

- [1] 腦部磁振造影為非侵襲性且無輻射累積和傷害。
- [2] 使用的顯影劑為含釷(Gadolinium)的化合物。此顯影劑在身體組織中非常穩定，而且安全性非常高。據統計其不良反應及過敏率非常低(1.14 至 3%)。這些反應大部份都是極為輕微的，如注射後口中感到怪味、注射處局部溫熱感或微痛、噁心、頭痛及眩暈等；其他較嚴重的反應如身體局部抽搐、蕁麻疹、臉潮紅、咽喉炎、心跳加速及心律不整等，則較少發生(發生率約 0.01% 至 0.07%)。嚴重過敏反應如休克致死極為罕見。
- [3] 依據美國食品暨藥物管理局(FDA)所發佈的警訊，此種含釷(Gadolinium)的化合物，對於急性或慢性腎功能不全病人(其腎絲球過濾率之實際或預估值已低於 30ml/min/1.73m<sup>2</sup>)，病人會有發生腎性全身纖維化症(Nephrogenic systemic fibrosis)之風險，因此有腎功能不全的病人將排除在此試驗外。
- [4] 如果您因藥物產生副作用，經過您的主治醫師或計劃主持人評估判斷您不適合繼續參與本試驗，就立即停止本研究試驗藥物 Alirocumab (保脂通)藥物治療，或是停用史塔汀類 (Statin) 藥物；依不適症狀，給予適當治療及檢查。
- [5] 藥物常見副作用如下：
  - 本研究試驗藥物 Alirocumab (保脂通)常見的副作用( $\geq 1/100 \sim < 1/10$ )，包含上呼吸道症狀(口咽疼痛、流鼻水、打噴嚏)、皮膚搔癢和注射部位反應(紅斑/發紅、搔癢、腫脹、疼痛/壓痛)，其他罕見的副作用( $\geq 1/10,000 \sim < 1/1,000$ )包含：過敏、過敏性血管炎、蕁麻疹和錢幣狀濕疹。全身性過敏反應的發生率為 Alirocumab (保脂通)治療組(8.1%)高於對照組(7.0%)，主要的差異為搔癢發生率。搔癢個案的狀況通常輕微且短暫。在為期 78 週的試驗(ODYSSEY LONG TERM)，本研究試驗藥物 Alirocumab (保脂通)藥物治療，在安全性部分只有肌痛的副作用有顯著增加(5.4% vs. 2.9%,  $p=0.006$ )。
  - Atorvastatin: 腹痛、肌肉痛、虛弱無力、頭痛、便秘、噁心、腹瀉、胃腸脹氣、消化不良、皮疹。
  - Rosuvastatin: 腹痛、肌肉痙攣、肌肉痛、肌肉僵硬、肌肉腫脹、虛弱無力、頭痛、便秘、噁心、腹瀉、胃腸脹氣、消化不良、皮疹。

人體試驗倫理委員會

110.3.22

長庚醫療財團法人



• 高強度 Statin 治療

- 單獨使用 Statin 治療病人大多耐受良好，不良反應發生率低。常見的副作用包括肌肉病變，其典型症狀為兩側、對稱性，且侷限於骨骼肌，伴隨著血中肌酸激酶濃度超過正常值上限 >10 倍。臨床試驗發現，肌肉病變發生率約 <0.1%，而橫紋肌溶解症(Rhabdomyolysis)則是比較嚴重的肌肉副作用，血中肌酸激酶濃度通常超過正常值上限 >40 倍，且可能導致急性腎衰竭，發生的機率大約是 0.01%。
- 使用中、高劑量的 Statin 時，大約 1% 的病人會產生肝功能指數上升(主要是 ALT 上升至正常值上限的 3 倍以上)，嚴重肝損傷較為罕見，發生率約 0.001%，且難以預測。
- Statin 會小幅增加新診斷糖尿病的相對風險(9%)，或增加絕對風險約每年 0.2%。但總體而言，Statin 於心血管保護的好處，實遠大於上述副作用。

八、其他可能之治療方式及說明：

目前針對顱內動脈粥狀硬化狹窄的病人，標準的治療為抗血小板和高強度史塔汀類 (Statin) 藥物治療，因此所有參與此計畫的病人，都會接受抗血小板和高強度史塔汀類 (Statin) 藥物治療。但治療組的病人會另外接受本研究試驗藥物 Alirocumab (保脂通) 治療。

這個試驗會用先進的腦部磁振造影，分析病人在治療前後的顱內動脈粥狀硬化斑塊變化，可提供給臨床醫師作為治療參考。

在決定是否參加本研究之前，您可以與您的主治醫師討論這些選擇的風險與益處。

如果您沒有參加這個試驗，並不會影響您的權益或是治療，臨床醫師如果認為需要腦部磁振造影，仍會替您安排檢查；藥物處置會依照原本的臨床常規治療。

九、本試驗之禁忌與限制，請您務必要充分配合之事項：

病人如果體內有植入金屬裝置，例如心律調整器、金屬心臟瓣膜、腦動脈瘤金屬夾...等是禁止接受腦部磁振造影，病人與家屬必須提供過去病史給醫師。

藥物產生的副作用經過您的主治醫師或計劃主持人評估判斷您不適合繼續參與本試驗，就立即停止本研究試驗藥物 Alirocumab (保脂通)。

請您務必按照醫師處方規則服用藥物並定期門診追蹤。

十、預期試驗效果：

病人接受本研究試驗藥物 Alirocumab (保脂通) 藥物治療後，會明顯減少低密度膽固醇濃度，推測可穩定顱內斑塊且減低動脈狹窄程度，進而降低再中風的風險。

在安全性方面，本研究試驗藥物 Alirocumab (保脂通)，通常耐受性良好未有顯著的嚴重副作用或因此需要停藥，一般注射部位反應 (5.3% vs. 2.8%)，屬輕微而不需停藥。

人體試驗倫理委員會  
110.3.22  
長庚醫療財團法人

### 十一、緊急狀況之處理：

若您參與本研究有任何的不適或不良反應以及相關問題，請隨時與您的主治醫師或計劃主持人反應，主持人神經科黃彥筑醫師 24 小時緊急聯絡電話為 0975353286。

### 十二、補助、費用負擔與損害補償：

1. 補助：無。

2. 費用負擔：參加本試驗您不需負擔任何費用

3. 損害補償：

(1) 對於身體傷亡責任有保險給付。

(2) 如依本研究所訂臨床試驗計劃因而發生不良事件或造成的損害，本院願意提供專業醫療照護及諮詢，您不必負擔治療不良反應或損害之必要醫療費用。

(3) 除上述之補償與醫療照顧外，本研究不提供其他形式之補償。若您不願意接受這樣的風險，請勿參加試驗。

(4) 您不會因為簽署本同意書而喪失在法律上的任何權利。

### 十三、保護隱私與機密性：

1. 將會有一個研究代碼代表您的身分，此代碼不會顯示您的姓名、身分證字號、住址。

2. 對於您訪查的結果及診斷，研究主持人將持保密的態度，小心維護您的隱私。如果發表研究結果，您的身分仍將保密。

3. 請您亦瞭解若簽署同意書即同意您的訪查紀錄可直接受監測者、稽核者、研究倫理委員會及主管機關檢閱，以確保本研究過程與數據符合相關法律及法規要求。上述人員並承諾絕不違反您的身分之機密性。

4. 請您瞭解基於安全考量，研究團隊可能會告知或連繫您的其他科別主治醫師，使其了解您參與的試驗及疾病治療狀況，以避免藥物交互作用造成危害。

### 十四、試驗之退出與中止：

受試者或立同意書人有權在無任何理由情況下，隨時要求終止參與試驗，此將不會減損您或您的親人的正當醫療權益與法律權利。試驗主持人亦可能於必要時中止該試驗之進行，如發生不能接受的副作用或依衛生主管機關的決定。當您退出本試驗/研究或主持人判斷您不適合繼續參與本試驗/研究時，在退出前已得到的資料將被保留，不會移除。

### 十五、受試者權利：

1. 對於您個人資料之蒐集、處理及利用，試驗機構/試驗主持人將依受試者同意書、臨床試驗相關法規及個人資料保護法相關規定辦理。您可以依據個人資料保護法之規定，以書面連絡試驗機構/試驗主持人而行使下列權利：

(1) 查詢或請求閱覽您的個人資料；

(2) 請求提供您個人資料的影印本；

(3) 請求補充或更正您的個人資料；

人體試驗倫理委員會  
核准日期

110. 3. 22

長庚醫療財團法人

|                                                                                                                                                                                                                                                    |
|----------------------------------------------------------------------------------------------------------------------------------------------------------------------------------------------------------------------------------------------------|
| <p>(4)請求停止蒐集、處理或利用您的個人資料；</p> <p>(5)請求刪除您的個人資料。</p> <p>2.研究過程中，凡可能影響您繼續接受臨床試驗意願的任何重大發現，都將及時提供給您。研究過程中如有任何的問題或狀況，請與主持人聯繫。</p> <p>3.對身為受試者之權利有意見或懷疑因參與研究而受害時，可與本院之人體試驗倫理委員會聯絡請求諮詢，其電話號碼為：(03)319-6200 轉 3707、3703、3705~3709、3711~3714、3716~3717。</p> |
| <p>十六、試驗成果及權益歸屬：</p> <p>如本試驗計畫成果產生學術文獻發表、實質效益或衍生其他權益時，亦同意無償捐贈給本院作為疾病預防、診斷及治療等公益用途。</p>                                                                                                                                                             |
| <p>十七、個人資料、檢體與檢體衍生物之保存與再利用：</p> <p>研究過程中所採集您的檢體將送至本院檢驗科進行檢驗，及提供個人相關資料將僅用於此研究，不會用作其他用途。本研究結束後，若有剩餘檢體將會統一銷毀，不做保存。</p>                                                                                                                                |
| <p>十八、聲明：</p> <p>本試驗內容及同意書已經_____ (請填寫取得同意書人姓名)完整口頭告知及說明，受試者本人/法定代理人已充分瞭解並同意，本同意書一式二份，已將研究用人體檢體採集同意書之副本交給受試者。</p>                                                                                                                                  |

|                   |
|-------------------|
| 人體試驗倫理委員會<br>核准日期 |
| 110. 3. 22        |
| 長庚醫療財團法人          |

|                                                                                                                                       |                 |             |                              |
|---------------------------------------------------------------------------------------------------------------------------------------|-----------------|-------------|------------------------------|
|  <p>長庚醫療財團法人<br/>CHANG GUNG MEDICAL FOUNDATION</p> | <p>頁 7 之 11</p> | <p>版本日期</p> | <p>【2021/03/17 Version3】</p> |
|---------------------------------------------------------------------------------------------------------------------------------------|-----------------|-------------|------------------------------|

A.受試者：\_\_\_\_\_ (正楷姓名)

\_\_\_\_\_ (簽名)

日期：\_\_\_\_年\_\_\_\_月\_\_\_\_日

B.取得同意書人：\_\_\_\_\_ (正楷姓名)

\_\_\_\_\_ (簽名)

日期：\_\_\_\_年\_\_\_\_月\_\_\_\_日

C.共/協同主持人：\_\_\_\_\_ (正楷姓名)

\_\_\_\_\_ (簽名)

日期：\_\_\_\_年\_\_\_\_月\_\_\_\_日

D.研究主持人：\_\_\_\_\_ (正楷姓名)

\_\_\_\_\_ (簽名)

日期：\_\_\_\_年\_\_\_\_月\_\_\_\_日

**\*\*收案對象符合【同意書簽署說明】第(一)項時，此欄位必須簽名\*\***

E.法定代理人/有同意權人/監護人/輔助人：\_\_\_\_\_ (正楷姓名)

\_\_\_\_\_ (簽名) 與受試者之關係：\_\_\_\_\_

日期：\_\_\_\_年\_\_\_\_月\_\_\_\_日

**\*\*收案對象符合【同意書簽署說明】第(二)項時，此欄位必須簽名\*\***

F.見證人：\_\_\_\_\_ (正楷姓名)

\_\_\_\_\_ (簽名)

日期：\_\_\_\_年\_\_\_\_月\_\_\_\_日

|                   |
|-------------------|
| 人體試驗倫理委員會<br>核准日期 |
| 110.3.22          |
| 長庚醫療財團法人          |

**【同意書簽署說明】****(一)法定代理人/有同意權人/監護人/輔助人使用時機：**

\* 醫療法 第 79 條/人體研究法 第 12 條/藥品優良臨床試驗準則 第五條：

1. 受試者為無行為能力(未滿七歲之未成人者或受監護宣告之人)，由法定代理人為之；受監護宣告之人，由監護人擔任其法定代理人。
2. 受試者為限制行為能力者(滿七歲以上之未成人或受輔助宣告之人)，應得其本人及法定代理人或輔助人之同意。
3. 受試者雖非無行為能力或限制行為能力者，但因意識混亂或有精神與智能障礙，而無法進行有效溝通和判斷時，由有同意權之人為之。

**(二)見證人使用時機：**

\* 藥品優良臨床試驗準則 第二十一條：

1. 受試者、法定代理人或有同意權人皆無法閱讀時，應由見證人在場參與所有有關受試者同意書之討論。見證人應閱讀受試者同意書及提供受試者之任何其他書面資料，以見證研究主持人或其指定之人員已經確切地將其內容向受試者、法定代理人或有同意權之人解釋，並確定其充分了解所有資料之內容。
2. 受試者、法定代理人或有同意權人，仍應於受試者同意書親筆簽名並載明日期。但得以指印代替簽名。
3. 見證人於完成口述說明，並確定受試者、法定代理人或有同意權人之同意完全出於其自由意願後，應於受試者同意書簽名並載明日期。
4. 研究相關人員不得為見證人。

**(三)法定代理人簽署順序：**

\* 依據醫療法第七十九條：醫療機構施行人體試驗時，應善盡醫療上必要之注意，並應先取得接受試驗者之書面同意；接受試驗者以有意思能力之成年人為限。但顯有益於特定人口群或特殊疾病罹患者健康權益之試驗，不在此限。

\* 依據人體試驗管理辦法 第五條：依據醫療法第七十九條第一項但書招募之成年或已結婚未成年之受試者，主持人應依下列順序取得其關係人至少一人之同意：

- 一、 配偶。
- 二、 父母。
- 三、 同居之成年子女。
- 四、 與受試者同居之祖父母。
- 五、 與受試者同居之兄弟姊妹。
- 六、 最近一年有同居事實之其他親屬。

前項第一款至第五款關係人之同意，以有同居事實者優先。

第一項關係人之同意，不得違反受試者曾表示之意思。

|                   |
|-------------------|
| 人體試驗倫理委員會<br>核准日期 |
| 110. 3. 22        |
| 長庚醫療財團法人          |

|                                                                                                                               |          |      |                       |
|-------------------------------------------------------------------------------------------------------------------------------|----------|------|-----------------------|
|  長庚醫療財團法人<br>CHANG GUNG MEDICAL FOUNDATION | 頁 9 之 11 | 版本日期 | 【2021/03/17 Version3】 |
|-------------------------------------------------------------------------------------------------------------------------------|----------|------|-----------------------|



### 【長庚醫療財團法人長庚紀念醫院/長庚大學/長庚科技大學 研究參與者需知】

親愛的受試者、家屬、民眾，您好：

在您符合試驗或研究之納入條件時，您可能被邀請參與長庚醫院/長庚大學/長庚科技大學的研究計畫，為了保障您參與研究的安全與權益，以下內容將向您說明長庚醫療財團法人人體試驗倫理委員會所做的努力與把關，包含：研究計畫如何審查、審查的重點為何以及受試者的權利。

#### ● 什麼是研究？

「研究」和「治療」是不一樣的。「治療」是已經歷經研究過程，完全了解治療以後可能發生的結果及副作用的發生機率。但「研究」是為了解答我們原來所不知道的知識，並不完全清楚會發生怎樣的結果。因此，**研究不是一定要參加，且不參加不會影響您後續接受醫療照護的權益或者遭受任何不公平的待遇。**

#### ● 什麼是人體試驗倫理委員會？

「人體試驗倫理委員會(Institutional Review Board, 簡稱IRB)」是為確保人體試驗或研究符合科學與倫理適當性，所設立的審查單位。由具專業知識的醫療人員，及法律專家、社會公正人士或民間團體代表等非醫學背景人士組成，協助研究人員了解受試者的處境，以確保受試者的安全與權益。**受試者對參與研究之相關權益有任何問題時，都可向長庚醫療財團法人人體試驗倫理委員會詢問。**

#### ● 人體試驗倫理委員會如何審查臨床試驗/研究計畫？審查的重點為何？

- (1) 在長庚醫院/長庚大學/長庚科技大學執行的研究，都需要經過長庚醫療財團法人人體試驗倫理委員會的審查，通過了才可執行。
- (2) 送到人體試驗倫理委員會的研究計畫，都會經過委員或者專家，以獨立、專業且謹慎的態度進行審查，審查的重點，包含：是否有詳盡告知受試者試驗相關的事宜(包含：試驗目的、試驗進行程序等)、其他可能替代的治療方式、參與研究的副作用、風險及好處、如何退出研究、參加者的照護與隱私是否受到保護等。
- (3) 在進行臨床研究審查時，長庚醫療財團法人人體試驗倫理委員會將評估這些研究計畫對於參與研究者可能造成的風險有哪些？有些風險是屬於身體上的疼痛、不適，有些則帶來心理上的不舒服，有些甚至對於您的社會及經濟方面造成影響，**長庚醫療財團法人人體試驗倫理委員會就是要去確保這些風險帶來的傷害已經盡力降到最小。**除了風險，我們也會去評估參與研究者從研究中預期得到的好處、這項研究可能會治癒疾病、可能不會痊癒疾病但可能改善受試者的生活品質、或對參加的人可能不會有好處，但對醫學研究的進步或對未來患有相同疾病的人發現新的治療方式而有所貢獻。長庚醫療財團法人人體試驗倫理委員會將**綜合評估每個研究計畫的風險相對於獲得的好處是不是合理，以決定是否通過該計畫**，風險大而對受試者或科學知識沒有任何好處的研究，將不會通過人體試驗倫理委員會的審查。
- (4) 研究計畫通過後，長庚醫療財團法人人體試驗倫理委員會與執行機構(長庚醫院/長庚大學/長庚科技大學)，會針對通過的計畫持續監督，以確定研究團隊確實按照通過的計畫書妥善執行，為受試者的權益把關。

|           |
|-----------|
| 人體試驗倫理委員會 |
| 日期        |
| 110.3.22  |
| 長庚醫療財團法人  |

● 做為一位受試者您的權利是什麼？

✓ 知的權利

(1) 了解研究的目的是什麼？

研究人員應該以通俗易懂的話，告訴您這個研究的目的是什麼。

(2) 研究過程將發生什麼事？

也就是您需要知道這個研究的程序該如何進行，包含：研究過程要您身上做哪些事？該怎麼配合？(例如隔多久要回診一次？每次要抽多少血？做什麼檢查?)，會帶給生活多少不便？

(3) 不參加研究有沒有其他治療方法？

研究不是一定要參加，因此您有權知道是否還有其他治療方法。

(4) 可能會發生什麼不良反應或風險？

任何研究一定有風險，因此需知道參加此研究的危險性有多大？同時，也務必了解萬一發生危險或緊急狀況時，該怎麼辦？和誰聯絡？如何聯絡？以及誰會提供後續醫療救治？還有相關費用問題。在加入研究前，研究人員都應仔細向您說明。

(5) 參與研究可能帶來什麼好處與試驗預期的成果？

研究人員有義務向您說明，這個研究可能對您帶來的好處，或者這個研究可能不會直接對您受益，但研究成果可能會發現新的治療方式對醫學進步、未來的人類有所貢獻，以便提供您考慮是否加入此研究。

(6) 如果您想退出研究計畫，該如何提出？

研究人員應該告訴您，若您參加研究後中途想退出，應該向誰提出？退出後有無照護計畫？退出研究後，您在參與期間所提供的資料是否繼續分析或保存？

(7) 當您有任何疑慮時，隨時可以向研究人員詢問

✓ 自由選擇參加研究的權利

在研究人員向您充分解釋研究目的、研究進程序、其他可能的替代治療、參加研究可能遭遇的風險與帶來的好處、研究的預期成果、退出試驗計畫的程序以及退出後的照護計畫後，經過您自主且有足夠時間的考慮是否參加此研究，並且簽署受試者同意書，您才算正式加入研究，成為受試者。

此外，如果您想要退出研究，您可以於任何時間點，不需要任何的理由，向研究的相關人員提出。而您退出的決定，也不會影響您後續接受醫療照護的權益或者遭受任何不公平的待遇。

✓ 被保護的權利

(1) 隱私與機密的保護

對於您於參與研究期間所提供的任何資訊，研究團隊人員有義務維護您的隱私，如果發表研究成果，或為確保研究過程與數據符合相關法律及法規要求，人體試驗倫理委員會或主管機關(例如：衛生福利部)將會檢閱研究之相關資訊，但您的身分仍將被保密。

(2) 保有您現在所擁有的合法權利 參與臨床研究時，並不會放棄您的任何合法的權利

人體試驗倫理委員會  
核准日期

2021.03.22

長庚醫療財團法人
